# Supplementary material for: Facile synthesis of crystalline RuSe2 nanoparticles as a novel pseudocapacitive electrode material for supercapacitors
Source: Royal Society of Chemistry journal article supplement (doi:10.1039/c9cc06023e), 2019-01-01
Supplement: c9cc06023e1.pdf [file c9cc06023e1.pdf]

## Electronic Supplementary Information (ESI<sup>†</sup>)

### Facile synthesis of crystalline RuSe<sub>2</sub> nanoparticles as a novel pseudocapacitive electrode material for supercapacitors

Xiaoru Yun,<sup>a</sup> Shanglin Wu,<sup>b</sup> Jingying Li,<sup>a</sup> Linshuo Li,<sup>a</sup> Ji Zhou,<sup>a</sup> Pengcheng Lu,<sup>a</sup> Heng Tang<sup>a</sup>  
and Yirong Zhu<sup>\*a</sup>

<sup>a</sup>College of Metallurgy and Material Engineering, Hunan University of Technology, Zhuzhou 412007, China

<sup>b</sup>School of Mechanical Engineering, Hunan University of Technology, Zhuzhou 412007, China  
E-mail: zhuyirong2004@163.com

#### Part I: Experimental section

##### Materials synthesis

All chemicals used in our experiment were of analytical grade and utilized without further purification. The RuSe<sub>2</sub> nanoparticles were prepared by hydrothermal approach followed by thermal treatment under Ar atmosphere. Firstly, the 1 g RuCl<sub>3</sub> · xH<sub>2</sub>O was dissolved in 250 mL of distilled water, and stirred for 10 min to obtain the homogeneous solution. Then, 25.93 mL of RuCl<sub>3</sub> · xH<sub>2</sub>O aqueous solution and 78.96 mg of selenium powders were mixed together, and vigorously agitated for 20 min. Subsequently, 5 mL of hydrazine hydrate and 19.07 mL of distilled water were added to the above mixed solution. After continually stirring for another 20 min, the resulting mixture was transferred to Teflon-lined stainless steel autoclave (100 mL) and maintained at 180 °C for 12 h. The as-obtained amorphous product was centrifuged by alternately using distilled water and absolute ethanol for three times, respectively, and further dried in a vacuum oven at 70 °C overnight. Lastly, the as-resulted amorphous product was

annealed at 650 °C under Ar atmosphere to obtain the crystalline RuSe<sub>2</sub> nanoparticles.

### **Materials characterization**

X-ray diffraction (XRD, Rigaku D/max 2550 VB<sup>+</sup>) was undertaken to survey the structure of the RuSe<sub>2</sub> nanoparticles. Raman spectroscopy (Labram-010) and X-ray photoelectron spectroscopy (XPS, K-Alpha) were employed to characterize the crystal structure, composition and chemical states of the RuSe<sub>2</sub> nanoparticles. Field emission scanning electron microscopy (FESEM, MIRA3) and the corresponding energy-dispersive X-ray spectroscopy (EDS) and elemental mapping were conducted to study the morphology and composition of the RuSe<sub>2</sub> nanoparticles. Transmission electron microscopy (TEM, JEM-2100F), high resolution transmission electron microscopy (HRTEM, JEM-2100F) and the corresponding selected area electron diffraction (SAED) were executed to examine the morphology and microstructure of the RuSe<sub>2</sub> nanoparticles. The N<sub>2</sub> adsorption/desorption test (BET, Autosorb-iQ2-MP) was utilized to evaluate the BET specific surface area and pore size distribution of the RuSe<sub>2</sub> nanoparticles.

### **Electrochemical measurements**

The working electrode was fabricated by mixing active materials, acetylene black, and polyvinylidene difluoride (PVDF) with a mass ratio of 80:10:10. A small amount of N-methyl-2-pyrrolidinone (NMP) was added to the above mixture and ground in a mortar to form the slurry. The as-resulted slurry was smeared onto the pretreated Platinum foil, and then vacuum-dried at 70 °C overnight. The mass loading of active material was about 2.0 mg cm<sup>-2</sup>. The electrochemical tests of the as-obtained working electrode were conducted in a three-electrode configuration in 1 M H<sub>2</sub>SO<sub>4</sub> aqueous solution, and the reference and counter electrodes were Hg/Hg<sub>2</sub>Cl<sub>2</sub> and platinum electrodes, respectively. A CHI760E electrochemical workstation was used to measure

the electrochemical performances of the as-prepared working electrode via cyclic voltammetry (CV), galvanostatic current charge-discharge (GCD) and electrochemical impedance spectroscopy (EIS).

## Part II: Supplementary figures

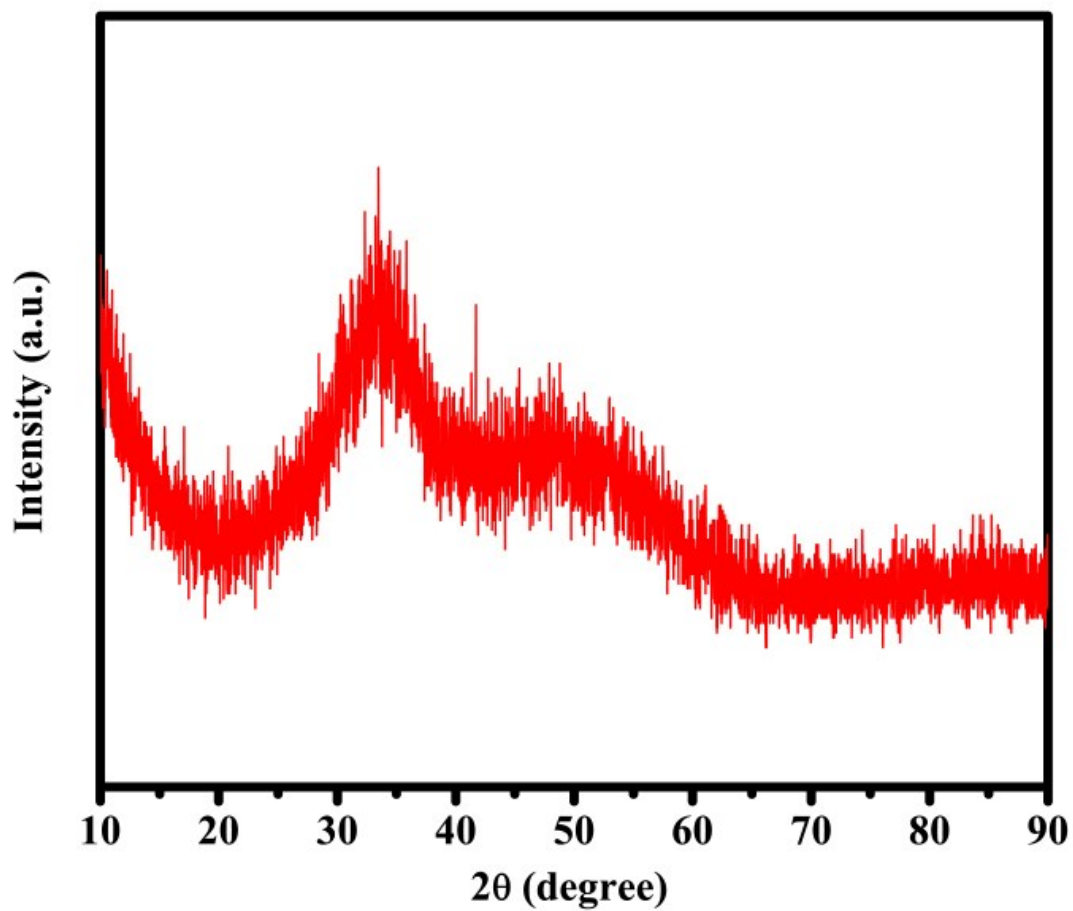

Fig.S1 XRD pattern of the RuSe<sub>2</sub> nanoparticles before thermal treatment

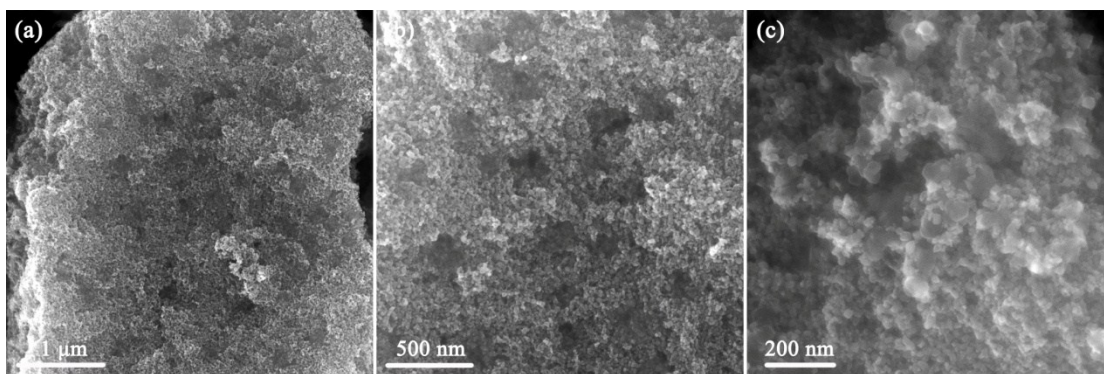

**Fig.S2** FESEM images of the RuSe<sub>2</sub> nanoparticles after 1000 charge/discharge cycles

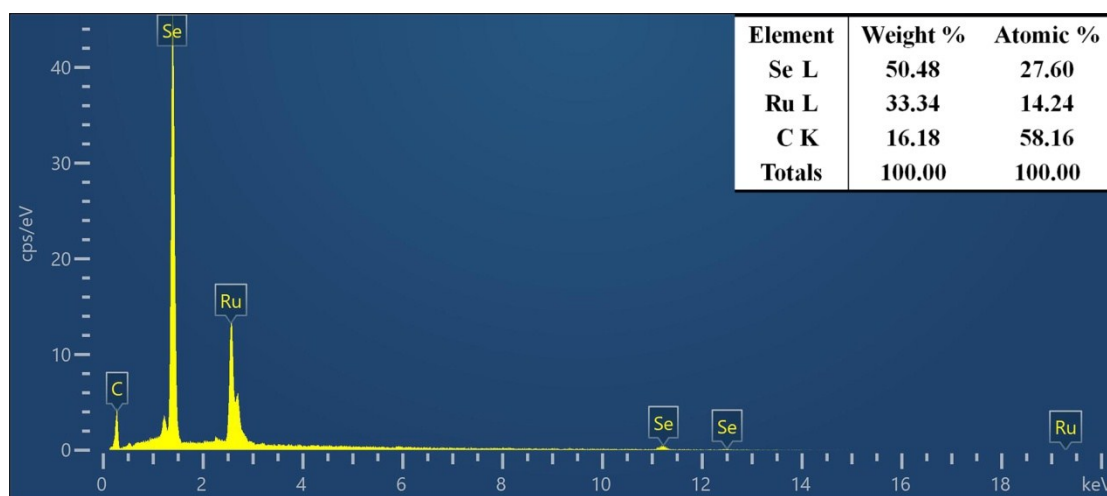

**Fig.S3** EDS spectrum of the RuSe<sub>2</sub> nanoparticles after 1000 charge/discharge cycles
